# Supplementary material for: Structure–Activity Relationship and Molecular Docking of Natural Product Library Reveal Chrysin as a Novel Dipeptidyl Peptidase-4 (DPP-4) Inhibitor: An Integrated In Silico and In Vitro Study
Source: PubMed Central journal article supplement (PMC6100528; doi:10.3390/molecules23061368), 2018-06-06
Supplement: molecules-23-01368-s001.pdf [file molecules-23-01368-s001.pdf]

**Table S1.** Resulted top 25 scoring natural compounds after Molecular docking simulations, novelty score, similarity to field template, positive electrostatics, negative electrostatics, hydrophobic shape, interacting residues at the binding site of enzyme and docking score. Color codes for interacting residues row are: red color denotes unfavorable interactions (bumps, negative-negative, donor-donor, acceptor-acceptor region, orange color indicates the formation of the salt bridge, green color denotes conventional hydrogen bond, pink color denotes pi-pi stack interactions.

| Sl.No | Compound Name               | Novelty Score and similarity | Positive electrostatics                                                             | Negative electrostatics                                                             | Hydrophobic Shape                                                                     | Interacting Residues                                                                  | Docking Score |
|-------|-----------------------------|------------------------------|-------------------------------------------------------------------------------------|-------------------------------------------------------------------------------------|---------------------------------------------------------------------------------------|---------------------------------------------------------------------------------------|---------------|
| 1     | Quercetin 3-O-glucuronide   | Very High, 60.6              |    |    |    |    | -36.253       |
| 2     | 3-Hydroxyhippuric acid      | Very High, 61.7              |    |    |    |    | -28.003       |
| 3     | Puerarin                    | Very High, 58.4              |    |    |    |    | -25.875       |
| 4     | trans-Resveratrol 3-sulfate | Vert High, 63.8              |   |   |   |   | -25.691       |
| 5     | Tectorigenin 4'-sulfate     | Very High, 59.9              |  |  |  |  | -24.937       |
| 6     | Feruloylglycine             | Very High, 64.4              |  |  |  |  | -24.833       |
| 7     | cis-Resveratrol 3-sulfate   | Very High, 64.0              |  |  |  |  | -24.621       |
| 8     | Quercetin 3'-sulfate        | Very High, 71.9              |  |  |  |  | -24.502       |
| 9     | Dihydroquercetin            | Very High, 71.7              |  |  |  |  | -24.371       |

|    |                                               |                 |                                                                                     |                                                                                     |                                                                                       |                                                                                       |         |
|----|-----------------------------------------------|-----------------|-------------------------------------------------------------------------------------|-------------------------------------------------------------------------------------|---------------------------------------------------------------------------------------|---------------------------------------------------------------------------------------|---------|
| 10 | 4-Hydroxy-(3',4'-dihydroxyphenyl)valeric acid | Very High, 63.3 | 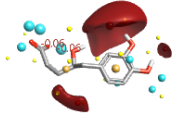   |    |    |    | -24.335 |
| 11 | 5,7-Dihydroxy-8,4'-dimethoxyisoflavone        | Very High, 64.2 |    |    |    |    | -24.232 |
| 12 | Phloretin                                     | Very High, 69.8 |    |    |    |    | -23.174 |
| 13 | 5,6,7,3',4'-Pentahydroxyisoflavone            | Very High, 69.9 |    |    |    |    | -22.787 |
| 14 | Butein                                        | Very High, 70.8 |    |    |    |    | -22.776 |
| 15 | 5,7,8,3',4'-Pentahydroxyisoflavone            | Very High, 67.0 |    |    |    |    | -22.776 |
| 16 | Vanilloylglycine                              | Very High, 62.2 |  |  |  |  | -22.665 |
| 17 | 7,8,3',4'-Tetrahydroxyisoflavone              | Very High, 68.1 |  |  |  |  | -22.655 |
| 18 | Hesperetin 3'-sulfate                         | Very High, 68.9 |  |  |  |  | -22.539 |
| 19 | Dihydroferuloylglycine                        | Very High, 65.7 |  |  |  |  | -22.474 |
| 20 | trans-Resveratrol 4'-sulfate                  | Very High, 62.9 |  |  |  |  | -22.355 |
| 21 | Biochanin A                                   | Very High, 63.0 |  |  |  |  | -22.306 |

|    |                             |                 |                                                                                   |                                                                                   |                                                                                     |                                                                                     |         |
|----|-----------------------------|-----------------|-----------------------------------------------------------------------------------|-----------------------------------------------------------------------------------|-------------------------------------------------------------------------------------|-------------------------------------------------------------------------------------|---------|
| 22 | Vestitone                   | Very High, 62.9 | 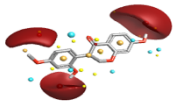 |  |  |  | -22.18  |
| 23 | m-Coumaric acid             | Very High, 61.8 |  |  |  |  | -22.101 |
| 24 | Delphinidin 3-O-galactoside | Very High, 58.6 |  |  |  |  | -22.073 |
| 25 | Chrysin                     | Very High, 74.5 |  |  |  |  | -21.4   |
